# Supplementary material
Source: Springer Nature journal article supplement (https://www.springermedizin.de/resource/supplementary/12936_2011_1772_MOESM4_ESM.pdf/9541700)

# *An. gambiae* s.s.

■ Indoor

□ Outdoor

Proportion of host seeking events

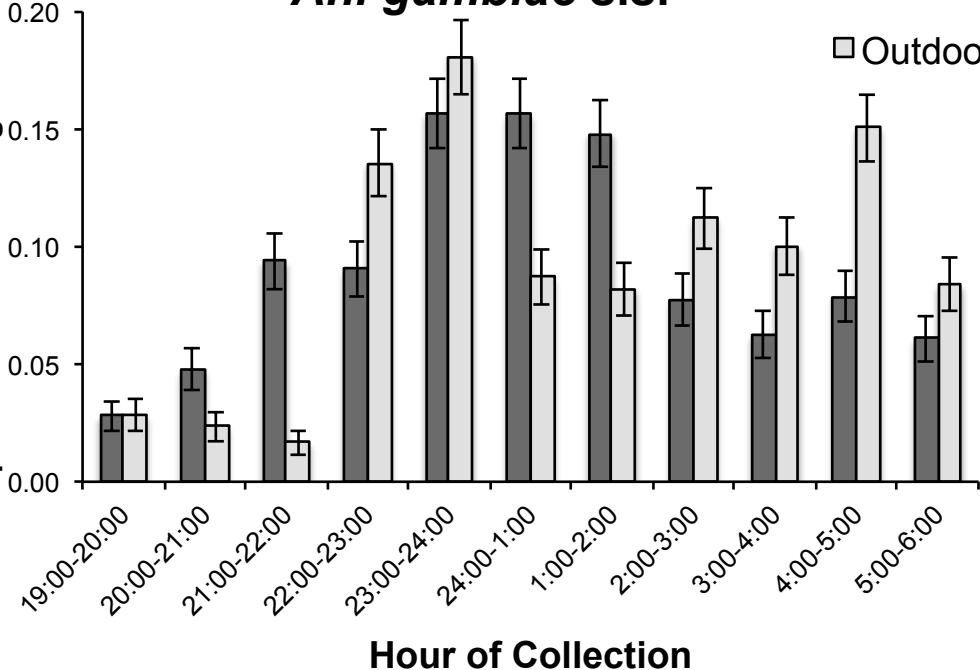

Hour of Collection

Supplement: MOESM4 [file 9541700]
